# Supplementary material
Source: PubMed Central journal article supplement (PMC6181641)
Supplement: fj.201701138RR.st2.pdf [file fj.201701138RR.st2.pdf]

**Table 2.** Ontology results of miRNAs represented families.

| <b>miRNA ID</b> | <b>miRNA family symbol</b>                    | <b>Elastase vs. Control<br/>(Fold change)</b> |
|-----------------|-----------------------------------------------|-----------------------------------------------|
| mmu-miR-147-3p  | miR-147 (and other miRNAs w/seed UGUGCGG)     | 10.8                                          |
| mmu-miR-19a-3p  | miR-19b-3p (and other miRNAs w/seed GUGCAAA)  | 9.1                                           |
| mmu-miR-675-3p  | miR-675-3p (miRNAs w/seed UGUAUGC)            | 7.4                                           |
| mmu-let-7i-3p   | let-7i-3p (miRNAs w/seed UGCGCAA)             | 5.9                                           |
| mmu-miR-466b-3p | miR-466b-3p (and other miRNAs w/seed UACAUAC) | 5.5                                           |
| mmu-miR-466c-3p |                                               | 5.5                                           |
| mmu-miR-466p-3p |                                               | 5.5                                           |
| mmu-miR-223-5p  | miR-223-5p (miRNAs w/seed GUGUAUU)            | 5.4                                           |
| mmu-miR-467c-5p | miR-467c-5p (and other miRNAs w/seed AAGUGCG) | 5.3                                           |
| mmu-miR-3473f   | miR-3473f (miRNAs w/seed AAUAGG)              | 4.8                                           |
| mmu-miR-34a-3p  | miR-34a-3p (and other miRNAs w/seed AUCAGCA)  | 4.3                                           |
| mmu-miR-3068-5p | miR-3068-5p (miRNAs w/seed UGGAGUU)           | 3.9                                           |
| mmu-miR-467b-5p | miR-467b-5p (miRNAs w/seed UAAGUGC)           | 3.8                                           |
| mmu-miR-210-5p  | miR-210-5p (and other miRNAs w/seed GCCACUG)  | 3.5                                           |
| mmu-miR-3082-5p | miR-3082-5p (and other miRNAs w/seed ACAGAGU) | 3.3                                           |
| mmu-miR-500-5p  | miR-362-5p (and other miRNAs w/seed AUCCUUG)  | 3.1                                           |
| mmu-miR-5104    | miR-5104 (miRNAs w/seed UGUGCUA)              | 2.9                                           |
| mmu-miR-341-3p  | miR-341 (and other miRNAs w/seed CGGUCGA)     | 1.9                                           |
| mmu-miR-6988-3p | miR-6821-3p (and other miRNAs w/seed GACCUCU) | 1.6                                           |
| mmu-miR-344f-5p | miR-344f-5p (miRNAs w/seed GUCAGUC)           | 1.6                                           |
| mmu-miR-1188-5p | miR-1188-5p (miRNAs w/seed GGUGUGA)           | 1.6                                           |
| mmu-miR-449c-5p | miR-34a-5p (and other miRNAs w/seed GGCAGUG)  | 1.4                                           |
| mmu-miR-98-3p   | let-7a-3p (and other miRNAs w/seed UAUACAA)   | -1.2                                          |
| mmu-miR-504-3p  | miR-504-3p (and other miRNAs w/seed GGGAGAG)  | -1.5                                          |
| mmu-miR-6998-5p | miR-6998-5p (miRNAs w/seed UGGGCAG)           | -1.7                                          |
| mmu-miR-7053-5p | miR-3092-5p (and other miRNAs w/seed GGGGAAA) | -2.1                                          |
| mmu-miR-204-3p  | miR-204-3p (and other miRNAs w/seed CUGGGAA)  | -2.2                                          |
| mmu-miR-7083-5p | miR-4508 (and other miRNAs w/seed CGGGGCU)    | -2.7                                          |
